# Supplementary material for: Robust Single-Trial EEG-Based Authentication Achieved with a 2-Stage Classifier
Source: MDPI journal article supplement (doi:10.3390/bios10090124), 2020-09-13
Supplement: s1 [file s1]

# Robust Single-Trial EEG-Based Authentication Achieved with a 2-Stage Classifier

Uladzislau Barayeu <sup>1,†</sup>, Nastassya Horlava <sup>2,†</sup>, Arno Libert <sup>3,\*</sup> and Marc Van Hulle <sup>3,\*</sup>

<sup>1</sup> Department of Biophysics, Belarusian State University, Nesavisimosti Ave., 4, 220030 Minsk, Republic of Belarus; barawlad@gmail.com;

<sup>2</sup> Department of Mathematical Modelling and Data Analysis, Belarusian State University, Nesavisimosti Ave., 4, 220030 Minsk, Republic of Belarus; nastassya.horlava@mailbox.tu-dresden.de

<sup>3</sup> Laboratory for Neuro- and Psychophysiology, Department of Neuroscience, KU Leuven, O&N2, Herestraat 49, 3000 Leuven, Belgium; arno.libert@kuleuven.be

\* Correspondence: marc.vanhulle@kuleuven.be

<sup>†</sup> These authors contributed equally to this work.

Received: 30 June 2020; Accepted: 11 September 2020; Published: date

## Supplementary Material

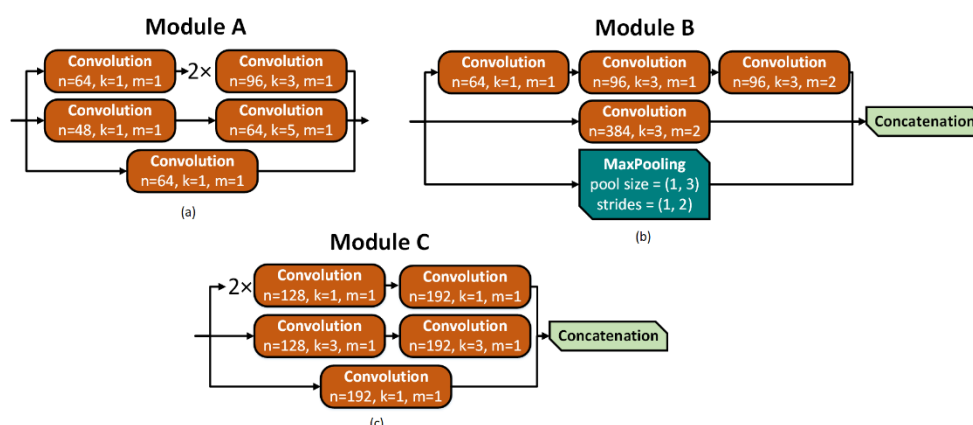

**Figure S1:** Modules A and C are intended for extending the number of feature maps, allowing the network to go deeper and increase performance. Module B is intended for the reduction of grid size. Modules A, B and C are only used in the inception-like NN.

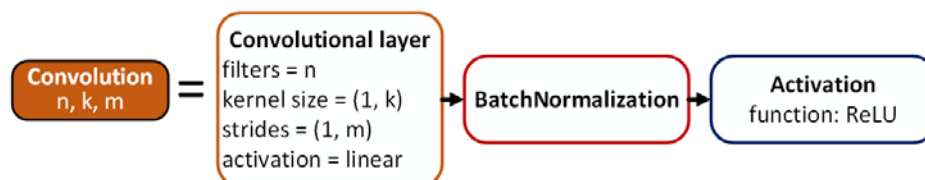

**Figure S2:** Convolution in the inception-like NN.

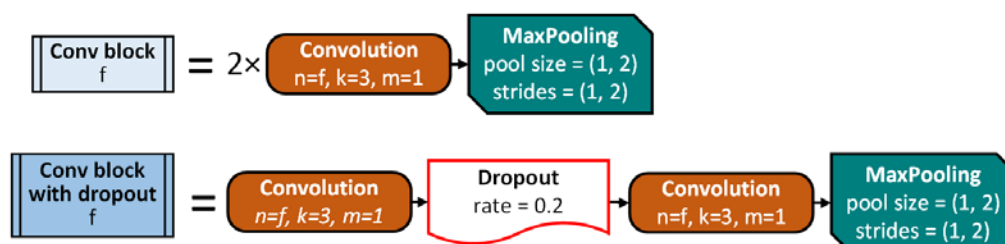

**Figure S3:** Structure of individual blocks of the VGG-like network.

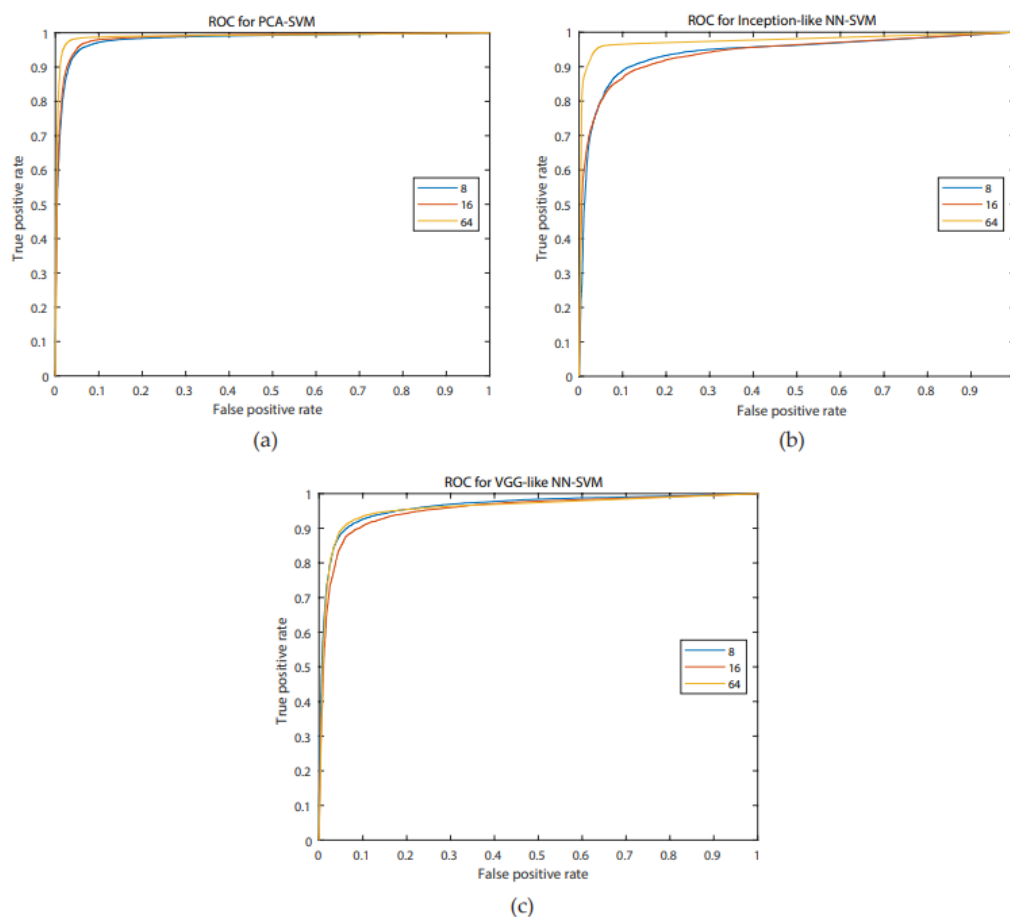

**Figure S4.** ROC curves for the 8 channels (blue), 16 channels (red), 64 channels (yellow) for FAR ranging from 0 to 1 for PCA-SVM (a), inception-like NN-SVM (b) VGG-like NN-SVM (c).

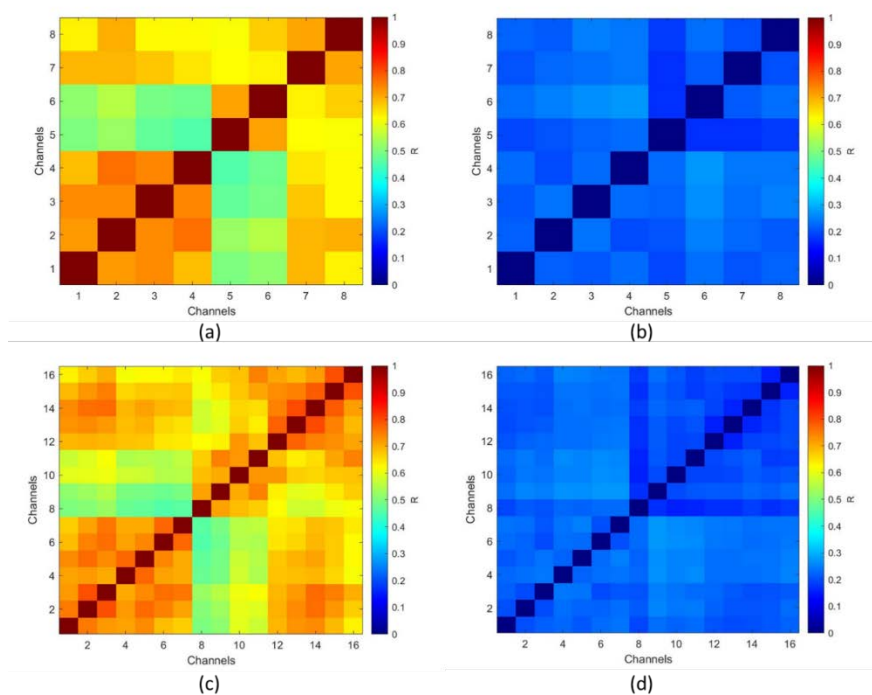

**Figure S5:** Mean cross-correlation of all features and standard deviation of the mean for 8 channels (a, b) and 16 channels (c, d).

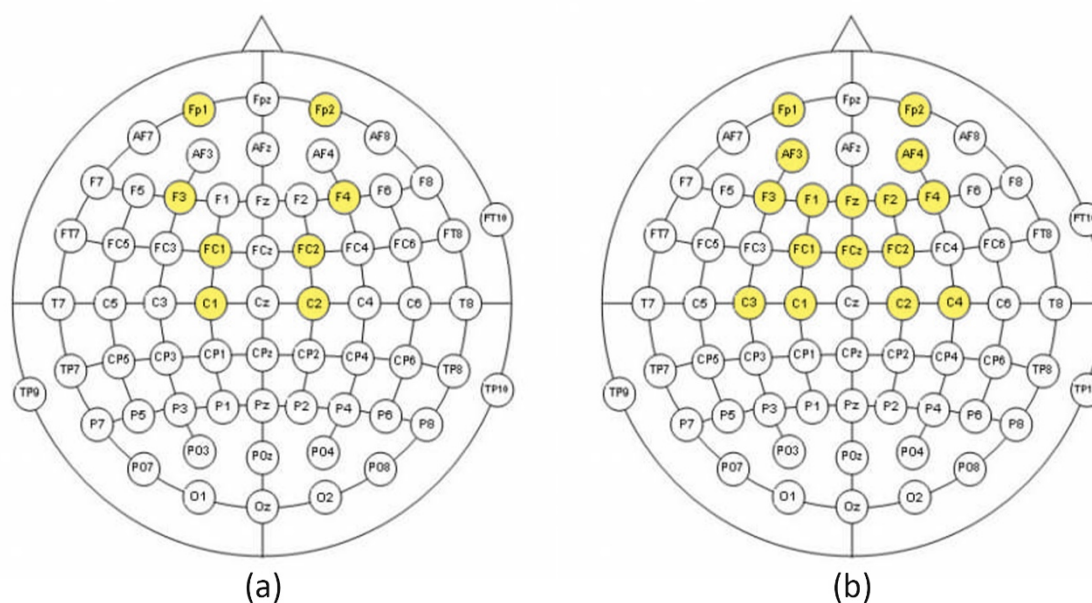

**Figure S6:** Representation of 8 (a) and 16(b) selected channels.

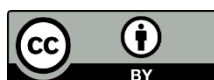

© 2020 by the authors. Licensee MDPI, Basel, Switzerland. This article is an open access article distributed under the terms and conditions of the Creative Commons Attribution (CC BY) license (<http://creativecommons.org/licenses/by/4.0/>).
